# Supplementary material for: The SsgA-like proteins in actinomycetes: small proteins up to a big task
Source: PubMed Central journal article supplement — Antonie Van Leeuwenhoek. 2008 Feb 14;94(1):85–97. doi: 10.1007/s10482-008-9225-3 (PMC2440963; doi:10.1007/s10482-008-9225-3), 2008-02-14
Supplement: 10482_2008_9225_MOESM1_ESM.pdf [file 10482_2008_9225_MOESM1_ESM.pdf]

**Table S1. SALP proteins that were subjected to phylogenetic analysis.** Nomenclature is based on highest sequence homology to the *S. coelicolor* SALP homologues. Database tags refer to the locus name given by the respective genome sequencing projects. Contigs refer to short sequence files extracted from the *S. scabies* database ([www.sanger.ac.uk/Projects/S\\_scabies](http://www.sanger.ac.uk/Projects/S_scabies)).

| Protein name    | Organism of origin                 | Database tag /contig number |
|-----------------|------------------------------------|-----------------------------|
| SsgA[Scoel]     | <i>S. coelicolor</i>               | SCO3926                     |
| SsgB[Scoel]     | <i>S. coelicolor</i>               | SCO1541                     |
| SsgC[Scoel]     | <i>S. coelicolor</i>               | SCO7289                     |
| SsgD[Scoel]     | <i>S. coelicolor</i>               | SCO6722                     |
| SsgE[Scoel]     | <i>S. coelicolor</i>               | SCO3158                     |
| SsgF[Scoel]     | <i>S. coelicolor</i>               | SCO7175                     |
| SsgG[Scoel]     | <i>S. coelicolor</i>               | SCO2924                     |
| SsgA[Saver]     | <i>S. avermitilis</i>              | SAV4267                     |
| SsgB[Saver]     | <i>S. avermitilis</i>              | SAV6810                     |
| SsgD[Saver]     | <i>S. avermitilis</i>              | SAV1687                     |
| SsgE[Saver]     | <i>S. avermitilis</i>              | SAV3605                     |
| SsgY[Saver]     | <i>S. avermitilis</i>              | SAV570                      |
| SsgZ[Saver]     | <i>S. avermitilis</i>              | SAV580                      |
| SsgA[Sscab]     | <i>S. scabies</i>                  | contig: scab0274d04.q1k     |
| SsgB[Sscab]     | <i>S. scabies</i>                  | contig: scab0975f02.p1k     |
| SsgD[Sscab]     | <i>S. scabies</i>                  | contig: scab0372d01.q1k     |
| SsgE[Sscab]     | <i>S. scabies</i>                  | contig: scab0136f09.q1k     |
| SsgG[Sscab]     | <i>S. scabies</i>                  | contig: sab0313c04.q1k      |
| SsgV[Sscab]     | <i>S. scabies</i>                  | contig: scab0162c08.q1k     |
| SsgW[Sscab]     | <i>S. scabies</i>                  | contig: scab0039b09.q1k     |
| SsgA[Sgris]     | <i>S. griseus</i>                  | SGR3655                     |
| SsgB[Sgris]     | <i>S. griseus</i>                  | SGR5997                     |
| SsgD[Sgris]     | <i>S. griseus</i>                  | SGR1004                     |
| SsgE[Sgris]     | <i>S. griseus</i>                  | SGR4320                     |
| SsgG[Sgris]     | <i>S. griseus</i>                  | SGR4615                     |
| SGR128[Sgris]   | <i>S. griseus</i>                  | SGR128                      |
| SGR41t[Sgris]   | <i>S. griseus</i>                  | SGR41t                      |
| SGR7098t[Sgris] | <i>S. griseus</i>                  | SGR7098t                    |
| SsgA[Salbu]     | <i>S. albus</i>                    | AF195771                    |
| SsgA[Sgold]     | <i>S. goldeniensis</i>             | AF195773                    |
| SsgA[Snetr]     | <i>S. netropsis</i>                | AF195772                    |
| SsgB[Tfusc]     | <i>Thermobifido fusca</i>          | Tfu_2111                    |
| SsgB[Kradi]     | <i>Kineococcus radiotolerans</i>   | Krad_3069                   |
| SsgB[Nocar]     | <i>Nocardioides</i>                | Noca_2368                   |
| SsgB[Acell]     | <i>Acidothermus cellulolyticus</i> | Acel_1369                   |
| SsgB[SalTr]     | <i>Salinispora tropica</i>         | Strop_1600                  |
| SsgB[SalAr]     | <i>Salinispora arenicola</i>       | Sare_1560                   |
| SsgB[Falni]     | <i>Frankia alni</i> ACN14a         | FRAAL2127                   |
| FrS1[Falni]     | <i>Frankia alni</i> ACN14a         | FRAAL5533                   |
| FrS2[Falni]     | <i>Frankia alni</i> ACN14a         | FRAAL4594                   |
| FrS3[Falni]     | <i>Frankia alni</i> ACN14a         | FRAAL5373                   |
| FrS4[Falni]     | <i>Frankia alni</i> ACN14a         | FRAAL6494                   |
| SsgB[Fcci3]     | <i>Frankia</i> sp. Ccl3            | Francci3_1359               |
| FrS1[Fcci3]     | <i>Frankia</i> sp. Ccl3            | Francci3_3418               |
| FrS2[Fcci3]     | <i>Frankia</i> sp. Ccl3            | Francci3_1632               |
| SsgB[Fean1]     | <i>Frankia</i> sp. EAN1pec         | Franean1_5158               |
| FrS2[Fean1]     | <i>Frankia</i> sp. EAN1pec         | Franean1_2058               |
| FrS5[Fean1]     | <i>Frankia</i> sp. EAN1pec         | Franean1_4060               |
| SsgB[Sacch]     | <i>Saccharopolyspora erythraea</i> | SACE_1961                   |
| SacS1[Sacch]    | <i>Saccharopolyspora erythraea</i> | SACE_5535                   |
